# Supplementary material for: Hybrid white quantum dot–organic light-emitting diodes with highly stable CIEx,ycoordinates by the introduction of n-type modulation and multi-stacked hole transporting layer
Source: Royal Society of Chemistry journal article supplement (doi:10.1039/d1tc00799h), 2021-01-01
Supplement: d1tc00799h1.pdf [file d1tc00799h1.pdf]

## Supporting Information

# Hybrid White Quantum Dot-Organic Light-Emitting Diodes with Stable CIE<sub>x,y</sub> Coordinates by Introduction of n-Type Modulation and Multi-Stacked Hole Transporting Layer

Hakjun Lee<sup>1</sup>, Seung-Won Song<sup>2</sup>, Kyo Min Hwang<sup>1</sup>, Ki Ju Kim<sup>1</sup>, Heesun Yang<sup>2</sup>, Young  
Kwan Kim<sup>1</sup>, and Taekyung Kim<sup>1,3</sup>

<sup>1</sup>Dept. of Information Display, Hongik University, Seoul, 04066, Korea

<sup>2</sup> Dept. of Materials Science and Engineering, Hongik University, Seoul, 04066, Korea

<sup>3</sup>Dept. of Materials Science and Engineering, Hongik University, Sejong, 30016, Korea

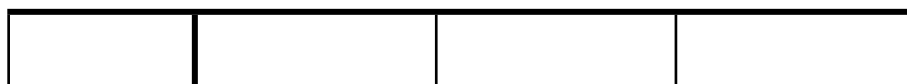

| <b>Voltage [V]</b> | <b>WQD-OLED A</b> | <b>WQD-OLED B</b> | <b>WQD-OLED C</b> |
|--------------------|-------------------|-------------------|-------------------|
| <b>7</b>           | (0.307, 0.334)    | (0.368, 0.260)    | (0.340, 0.301)    |
| <b>8</b>           | (0.272, 0.332)    | (0.338, 0.253)    | (0.330, 0.294)    |
| <b>9</b>           | (0.245, 0.333)    | (0.310, 0.255)    | (0.312, 0.290)    |
| <b>10</b>          | (0.228, 0.337)    | (0.322, 0.277)    | (0.302, 0.300)    |
| <b>11</b>          | (0.227, 0.344)    | (0.383, 0.321)    | (0.310, 0.325)    |

**Table S1.** Variations of CIE coordinates of 3 types of WQD-OLEDs according to the applied voltages.

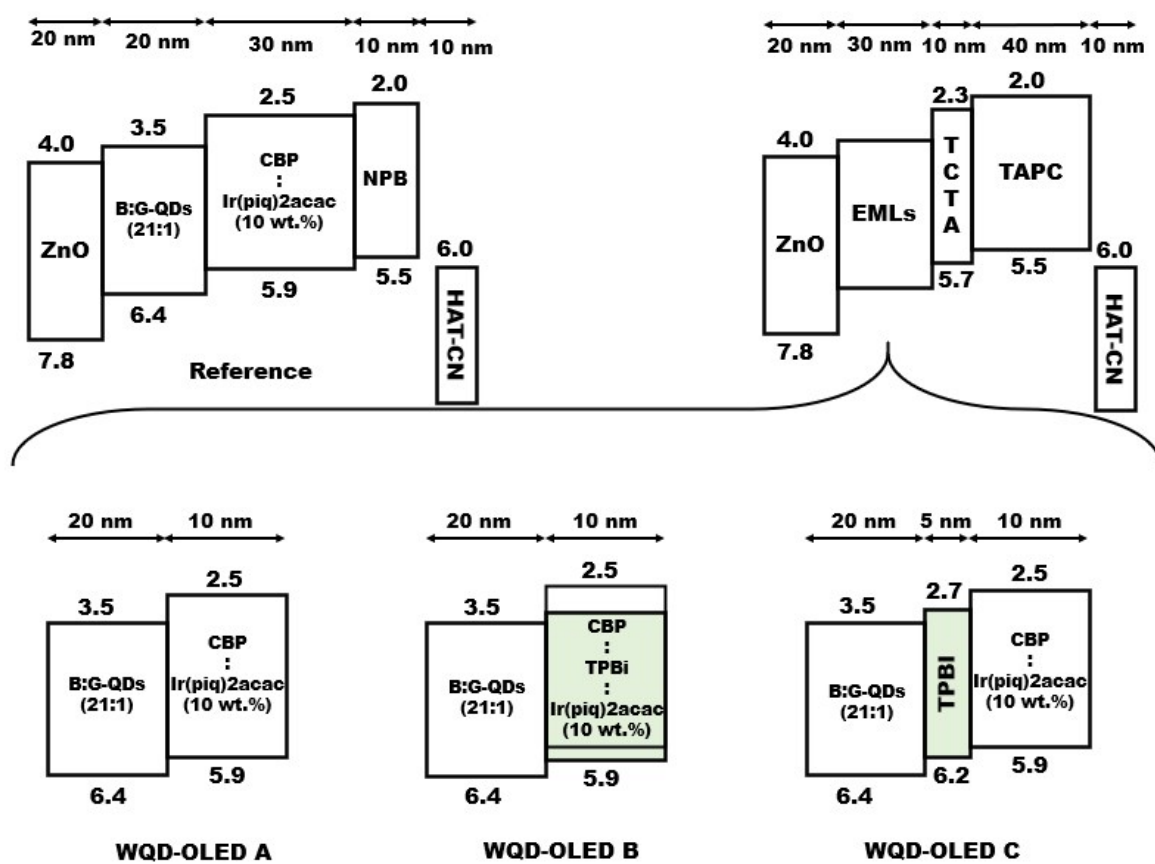

Figure S1. Schematic diagrams of EML in WQD-OLEDs.

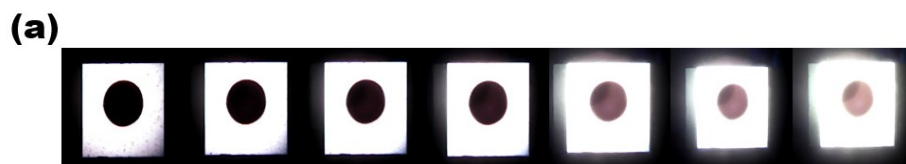

**(b)**

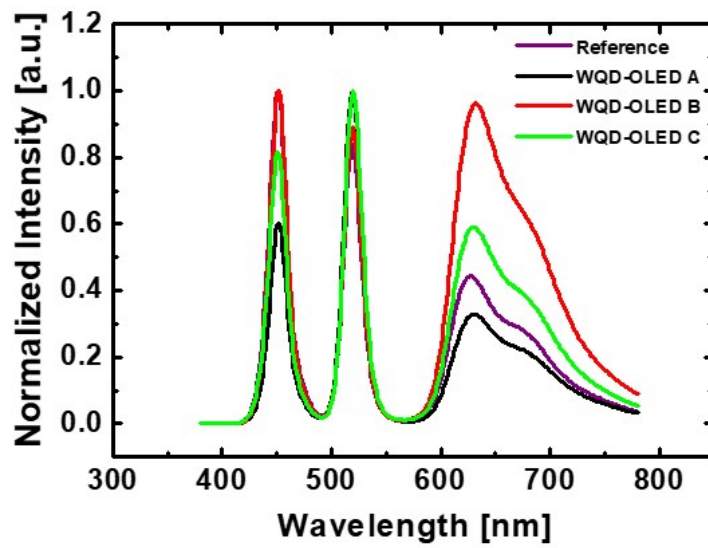

**Figure S2.** (a) The photographs showing stable white color for each voltage from 6 V (turn-on) to 12 V (b) As-collected and/or normalized EL spectra at 8 V, which is a moderate driving voltage of 4 type WQD-OLEDs.

(a)

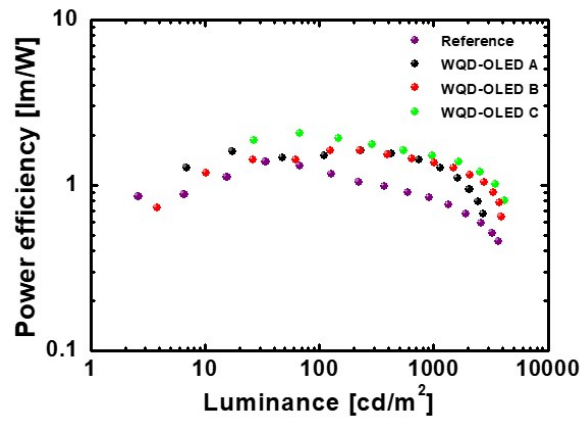

(b)

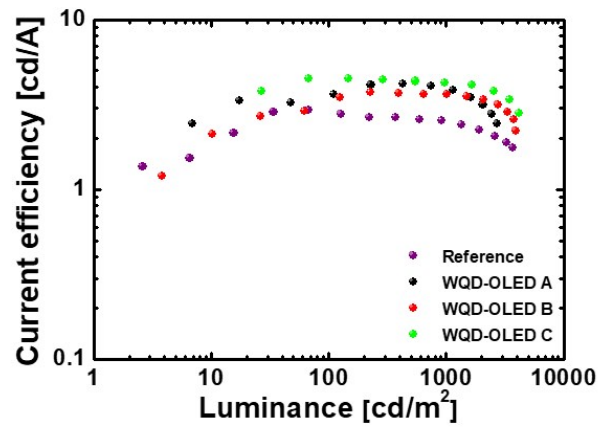

**Figure S3.** (a) Luminance-dependent variations of (a) power efficiency and (b) current efficiency of 4 types of WQD-OLEDs.

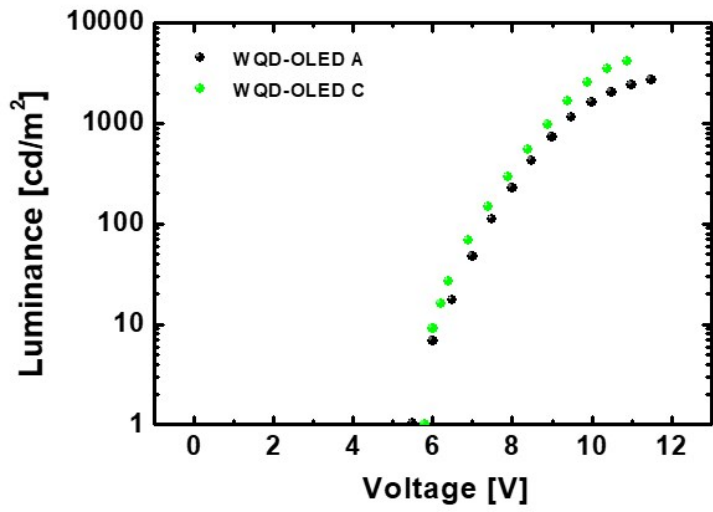

Figure S4. Voltage-dependent variations of luminance of WQD-OLED A and C.

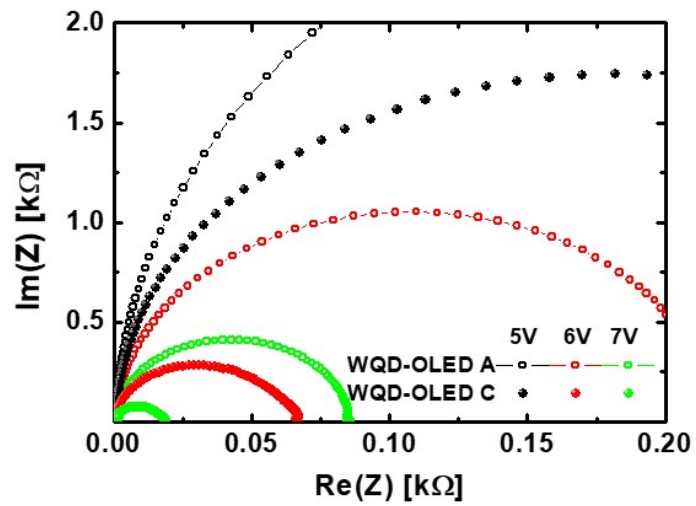

Figure S5. The Cole-Cole plot of impedance of WQD-OLED A and C.
